# Supplementary material
Source: PubMed Central journal article supplement (PMC3357990)
Supplement: cr2011173x2.pdf [file cr2011173x2.pdf]

| <b>Supplementary information, Table S1</b> List of DNA oligos used in this study. |                                                 |
|-----------------------------------------------------------------------------------|-------------------------------------------------|
| <b>Primers for Bisulfite sequencing</b>                                           |                                                 |
| GTAAAATGATTATATGATGGGTTAATAGATATGGATT                                             | RD29A-Bi-F                                      |
| TATCTCTTCATAACCTTATACAATTACTCTCCA                                                 | RD29A-trans-Bi-R                                |
| TTTCTAAAATTTAAAATCTACCTAAAATACTACTAA                                              | RD29A-endo-Bi-R                                 |
| AAAGTGGTTGTAGTTTATGAAAGGTTTAT                                                     | MEA-ISR-Bi-F                                    |
| CTTAAAAAATTTTCAACTCATTTTTTTTAAAAAA                                                | MEA-ISR-Bi-R                                    |
| TTATAAATATAAAATTGTAAAGTAAATTAATAAATT                                              | soloLTR-Bi-F                                    |
| TCTTCAAAAAAATAAAACTATATATCTCAATTAT                                                | soloLTR-Bi-R                                    |
| <b>Primers for PCR based methylation , RT-PCR, Probe amplification</b>            |                                                 |
| GTGGATATACCAAAAACACAA                                                             | AtMu1-F, McrBC, Probe amplification             |
| CTTAGCCTTCTTTTCAATCTCA                                                            | AtMu1-R, McrBC, Probe amplification             |
| ACAGTGCCACAGTTGAGCAG                                                              | AtGP1-F, RT-PCR, Small RNA probe amplification  |
| CAGAAAAATACTCGGTGCCAAT                                                            | AtGP1-R, RT-PCR, Small RNA probe amplification  |
| GGTGAATTAAGAGGAGAGAGGAGG                                                          | RD29A-promoter-F, small RNA probe amplification |
| GTGGTGGTTCCTCTGTTTGATCCATTTTCC                                                    | RD29A-promoter-R, small RNA probe amplification |
| GGATGCGATCATAACAG                                                                 | 5S rDNA-F, Southern probe amplification         |
| GAGGGATGCAMCACSAG                                                                 | 5S rDNA-R, Southern probe amplification         |
| TCCCGAGAAGAGTAGAACAAATGCTAAAA                                                     | IGN5_B-F, RT-PCR                                |
| CTGAGGTATTCCATAGCCCCTGATCC                                                        | IGN5_B-R, RT-PCR                                |
| aactaacgtcattacatacacatcttg                                                       | soloLTR-F1, RT-PCR for transcript A             |
| aattagatcttggtccagcta                                                             | soloLTR-R1, RT-PCR for transcript A             |
| catataaccgaagccgaaggatgtgaaa                                                      | soloLTR B A217, RT-PCR for transcript B         |
| cagaaacctaaggaaccattacagcgtaaacc                                                  | soloLTR B A218, RT-PCR for transcript B         |
| ACCAACGTGCTGTTGGCCAGTGGTAAATC                                                     | AtSN1 A-F, RT-PCR for transcript A, HaeIII PCR  |
| AAAATAAGTGGTGGTTGTACAAGC                                                          | AtSN1 A-R, RT-PCR for transcript A, HaeIII PCR  |
| TGAGAGATTTACCACTGGGCCAACA                                                         | AtSN1 B-F, RT-PCR for transcript B              |
| TGAGGAGCTCAACACATAAATGGCAATA                                                      | AtSN1 B-R, RT-PCR for transcript B              |
| ATGAGCAATGTGACTACCAG                                                              | ROS1-F, RT-PCR                                  |
| TCAAAGTTACTGCTCGGTAC                                                              | ROS1-R, RT-PCR                                  |
| <b>Primers for real-time PCR</b>                                                  |                                                 |
| CCTGTCGTGTCTTCCGATTACAC                                                           | RD29A-Q-F                                       |
| GACAATTCGGACAGAGGATGATG                                                           | RD29A-Q-R                                       |
| GGAGAGCAACTGCATAAGGCTATG                                                          | LUC-Q-F                                         |
| GACGATTCTGTGATTTGTATTACGC                                                         | LUC-Q-R                                         |
| CAAGCTCTCAGCAATATCACGG                                                            | NPTII-Q-F                                       |
| GATGCCTGCTTGCCGAATATC                                                             | NPTII-Q-R                                       |
| GCGATTCTCCGTTACAGCTTG                                                             | TUB4-Q-F                                        |
| CAAAGACGAAGTTATCAGGACGG                                                           | TUB4-Q-R                                        |
| <b>Small RNA probes</b>                                                           |                                                 |
| ACCAACGTGTTGTTGGCCAGTGGTAAATCTCTCAGATAGAGG                                        | AtSN1 siRNA probe                               |
| ATGCCAAGTTTGGCCTCACGGTCT                                                          | siRNA1003 probe                                 |
| GTTGACCAGTCCGCCAGCCGAT                                                            | siRNA02, LNA probe                              |
| AAGATCAAACATCAGCAGCGTCAGAGGCTT                                                    | Cluster4 siRNA, LNA probe                       |
| TACGCTATGTTGACTTAGAA                                                              | ta-siRNA255 probe                               |
| GATATTGGCGCGGCTCAATCA                                                             | microRNA171 probe                               |
| <b>Primers for genomic <i>DTF1</i> sequence amplification and cloning</b>         |                                                 |
| actggtatcGATGGCCCATGTGAAAATGAAG                                                   | DTF1-BamHI-F                                    |
| actctgcagGATATGTATCGAGAAAGCATTATTGAA                                              | DTF1-PstI-R                                     |
